# Supplementary material for: Hypoxic pulmonary vasoconstriction as a regulator of alveolar-capillary oxygen flux: A computational model of ventilation-perfusion matching
Source: PubMed Central journal article supplement (PMC8130924; doi:10.1371/journal.pcbi.1008861), 2021-05-06
Supplement: pcbi.1008861.s002.pdf [file pcbi.1008861.s002.pdf]

**Table 1. Pulmonary vascular network and perfusion zone morphometry Descriptive statistics for each vascular network. Quantities are presented as mean  $\pm$  standard deviation. The top block summarizes the size of the perfusion zones, and the bottom block summarizes the diameters and lengths for each diameter-defined Strahler order.**

| Network                                    |          | A                          |                          |          | B                          |                          |          | C                          |                          |  |
|--------------------------------------------|----------|----------------------------|--------------------------|----------|----------------------------|--------------------------|----------|----------------------------|--------------------------|--|
| Area of perfusion zone ( $\mu\text{m}^2$ ) |          | 907.34 $\pm$ 227.68        |                          |          | 594.19 $\pm$ 150.69        |                          |          | 639.47 $\pm$ 165.07        |                          |  |
| dd Strahler Order                          | Segments | Diameter ( $\mu\text{m}$ ) | Length ( $\mu\text{m}$ ) | Segments | Diameter ( $\mu\text{m}$ ) | Length ( $\mu\text{m}$ ) | Segments | Diameter ( $\mu\text{m}$ ) | Length ( $\mu\text{m}$ ) |  |
| 12                                         | 1        | 540.53                     | 2,250.00                 | 2        | 600.90 $\pm$ 0.67          | 525.00 $\pm$ 300.00      | 3        | 589.10 $\pm$ 0.83          | 625.00 $\pm$ 304.14      |  |
| 11                                         | 4        | 533.91 $\pm$ 2.28          | 375.00 $\pm$ 75.00       | 26       | 485.95 $\pm$ 3.63          | 452.88 $\pm$ 51.88       | 8        | 568.70 $\pm$ 1.92          | 487.50 $\pm$ 40.09       |  |
| 10                                         | 5        | 510.21 $\pm$ 4.13          | 405.00 $\pm$ 137.48      | 29       | 360.15 $\pm$ 4.44          | 375.00 $\pm$ 39.74       | 4        | 517.90 $\pm$ 1.35          | 450.00 $\pm$ 61.24       |  |
| 9                                          | 14       | 385.69 $\pm$ 6.42          | 514.28 $\pm$ 72.85       | 32       | 255.61 $\pm$ 3.36          | 473.44 $\pm$ 40.75       | 21       | 407.19 $\pm$ 4.47          | 442.85 $\pm$ 52.25       |  |
| 8                                          | 34       | 266.08 $\pm$ 4.20          | 555.88 $\pm$ 47.62       | 136      | 185.18 $\pm$ 1.14          | 266.91 $\pm$ 20.35       | 29       | 322.25 $\pm$ 3.61          | 411.21 $\pm$ 40.37       |  |
| 7                                          | 89       | 185.16 $\pm$ 1.41          | 317.70 $\pm$ 30.53       |          |                            |                          | 22       | 253.83 $\pm$ 4.09          | 507.95 $\pm$ 52.21       |  |
| 6                                          |          |                            |                          |          |                            |                          | 122      | 184.13 $\pm$ 1.11          | 288.32 $\pm$ 18.47       |  |
